# Supplementary material for: Complexin-1 regulated assembly of single neuronal SNARE complex revealed by single-molecule optical tweezers
Source: PubMed Central journal article supplement (PMC9905088; doi:10.1038/s42003-023-04506-w), 2023-02-07
Supplement: 42003_2023_4506_MOESM3_ESM.pdf [file 42003_2023_4506_MOESM3_ESM.pdf]

## Description of Additional Supplementary Files

**File name:** Supplementary Movie

**Description:** Supplementary movie demonstrates how the single molecule DNA forms the tether between two microspheres.
